# Dosage-sensitive X-linked locus influences the development of amygdala and orbitofrontal cortex, and fear recognition in humans

Catriona D. Good,<sup>1</sup> Kate Lawrence,<sup>2</sup> N. Simon Thomas,<sup>3</sup> Cathy J. Price,<sup>1</sup> John Ashburner,<sup>1</sup> Karl J. Friston,<sup>1</sup> Richard S. J. Frackowiak,<sup>1,5</sup> Lars Oreland<sup>4</sup> and David H. Skuse<sup>2</sup>

<sup>1</sup>Wellcome Department of Imaging Neuroscience, Institute of Neurology, <sup>2</sup>Behavioural and Brain Sciences Unit, Institute of Child Health, London, <sup>3</sup>Wessex Regional Genetics Laboratory, Salisbury District Hospital, Salisbury, UK, <sup>4</sup>Department of Neuroscience, Section of Pharmacology, BMC, Uppsala, Sweden and <sup>5</sup>Instituto Santa Lucia, Rome, Italy

Correspondence to: David Skuse, Behavioural and Brain Sciences Unit, Institute of Child Health, 30 Guilford Street, London WC1N 1EH, UK.  
E-mail: dskuse@ich.ucl.ac.uk

## Summary

The amygdala, which plays a critical role in emotional learning and social cognition, is structurally and functionally sexually dimorphic in humans. We used magnetic neuroimaging and molecular genetic analyses with healthy subjects and patients possessing X-chromosome anomalies to find dosage-sensitive genes that might influence amygdala development. If such X-linked genes lacked a homologue on the Y-chromosome they would be expressed in one copy in normal 46,XY males and two copies in normal 46,XX females. We showed by means of magnetic neuroimaging that 46,XY males possess significantly increased amygdala volumes relative to normal 46,XX females. However, females with Turner syndrome (45,X) have even larger amygdalae than 46,XY males. This finding implies that haploinsufficiency for one or more X-linked genes influences amygdala development irrespective of a direct or indirect (endocrinological) mechanism involving the Y-chromosome. 45,X females also have increased grey matter volume in the orbitofrontal cortex bilaterally, close to a region implicated in emotional learning. They are as poor as patients with bilateral amygdalectomies in the recognition of fear from facial expressions. We attempted to localize the gene(s) responsible for these

deficits in X-monosomy by means of a deletion mapping strategy. We studied female patients possessing structural X-anomalies of the short arm. A genetic locus (no greater than 4.96 Mb in size) at Xp11.3 appears to play a key role in amygdala and orbitofrontal structural and (by implication) functional development. Females with partial X-chromosome deletions, in whom this critical locus is deleted, have normal intelligence. Their fear recognition is as poor as that of 45,X females and their amygdalae are correspondingly enlarged. This 4.96 Mb region contains, among others, the genes for monoamine oxidase A (MAOA) and B (MAOB), which are involved in the oxidative deamination of several neurotransmitters, including dopamine and serotonin. Abnormal activity of these neurotransmitters has been implicated in the aetiology of several neurodevelopmental disorders in which social cognitive deficits are prominent. These associated deficits include a specific lack of fear recognition from facial expressions. We show that the thrombocytic activity of MAOB is proportionate to the number of X-chromosomes, and hypothesize that haploinsufficiency of this enzyme in 45,X females predisposes to their deficits in social cognition.

**Keywords:** amygdala; Turner syndrome; X-chromosome; fear; emotion

**Abbreviations:** SHOX = short-stature homeobox-containing gene; IQ = intelligence quotient; MAO = monoamine oxidase; OFC = orbitofrontal cortex; PAR = pseudoautosomal region

## Introduction

The evolution of the sex chromosomes has given rise to unique mechanisms of regulation, so as to equalize gene

expression between the sexes (Disteche, 1999). In normal females one of the two X-chromosomes is inactivated at

random in order to ensure equal expression of X-linked genes in male and female mammals (Lyon, 1961). Genes that escape X-inactivation are found at the tips of the X and Y chromosome arms in the so-called pseudoautosomal regions (PARs), where the equivalent nucleotide sequence is identical in both sex chromosomes, thus allowing meiotic recombination to take place. Surprisingly, many genes are now known to escape inactivation elsewhere on the X-chromosome. These are non-randomly distributed, lie mostly on the short arm, and do not necessarily have expressed Y-homologues (Carrel *et al.*, 1999). Persistence of a dosage imbalance in such genes between males (46,XY) and females (46,XX) may be important for sex-specific functions (Disteche, 1999). We considered that it should be possible to identify the effects of dosage-sensitive loci on brain development by studying Turner syndrome females who have a single X-chromosome (45,X or X-monosomy) and who are therefore haploinsufficient for non-inactivated X-linked genes relative to normal females (Zinn and Ross, 1998).

Turner syndrome is a chromosomal disorder, with a prevalence of 1 per 2500 live female births, in which typically all or a substantial part of one X-chromosome is missing because of non-disjunction or chromosome loss during early cleavage of the zygote. In 70% of cases of monosomic (45,X) Turner syndrome the single X-chromosome is maternally inherited (Jacobs *et al.*, 1997), the remainder being paternally inherited. In monosomy X this single chromosome is never inactivated, although in normal 46,XX females one of the two X-chromosomes is inactivated at random during the blastocyst stage of development (Boumil and Lee, 2001). Dosage-sensitive genes that escape X-inactivation may contribute to some features of Turner syndrome if haploinsufficient in X-monosomy. For example, *SHOX* (Blaschke and Rappold, 2001) is now known to contribute to the short stature of the syndrome, and is normally expressed from the PAR1 of both the X- and the Y-chromosome.

### ***Autistic features associated with Turner syndrome***

Most cases of Turner syndrome show normal verbal intelligence but almost all have poor visuospatial abilities (Temple and Carney, 1995). Impairments in social skills and affective discrimination characterize a substantial proportion of 45,X females, who possess limited numbers of friends and who experience social isolation and a poor self-concept (Ross *et al.*, 2000; McCauley *et al.*, 2001). Recently, we have discovered evidence that the condition is associated with a substantially increased risk of autism (at least 200 times) (Creswell and Skuse, 1999).

We discovered reliable and profound deficits in the recognition of faces and in the identification of a 'fearful' facial expression in Turner syndrome women of normal verbal intelligence (Lawrence *et al.*, 2003a, b). Because these

deficits were reminiscent of those reported in people with autism (e.g. Howard *et al.*, 2000) we hypothesized that, in view of the increased risk of autistic behaviours in 45,X females, they would possess other anomalies in socio-perceptual processing. The processing of gaze was one such feature that interested us, because children with autism and those at risk for developing autism show less eye contact and a reduced ability to follow the gaze of another, especially when the attention of the other is directed to an event of social interest (Ruffman *et al.*, 2001). We confirmed that women with Turner syndrome had difficulty ascertaining gaze direction from face photographs showing small lateral angular gaze deviations. They also had difficulty discriminating the detection of egocentric gaze and the detection of allocentric gaze (Elgar *et al.*, 2002).

### ***Amygdala anomalies and autism***

A number of recent studies have implicated the amygdala in the neurobiology of autism (e.g. Baron-Cohen *et al.*, 2000; Howard *et al.*, 2000; Grelotti *et al.*, 2002; Salmond *et al.*, 2003). They show a lack of amygdala activation in functional MRI studies of exposure to facial expressions that would normally evoke a response, and poor cognitive performance on tasks that involve neural processing by this structure. Specifically, amygdala-related cognitive deficits include poor facial recognition memory (Davies *et al.*, 1994), failure to recognize specific facial emotions, especially fear (Howard *et al.*, 2000) and lack of interest in and failure to follow eye gaze normally (Baron-Cohen *et al.*, 1997). Post-mortem studies of autistic individuals have found increased cell density and abnormally small cells in the amygdala (Bauman and Kemper, 1985; Bailey *et al.*, 1998; Kemper and Bauman, 2002). There have also been structural imaging studies that have identified abnormalities of amygdala volume (Aylward *et al.*, 1999; Howard *et al.*, 2000; Pierce *et al.*, 2001). A recent structural imaging study in autism concluded that, although no neural area was abnormal in all cases of autism studied by a novel and sensitive brain imaging technique (voxel-based morphometry), abnormalities were present, particularly in the amygdala and in the orbitofrontal cortex (OFC), among those with an intelligence quotient (IQ) in the normal range (Salmond *et al.*, 2003).

The caudal OFC receives direct projection from the amygdala in primates (Stefanacci and Amaral, 2002) and also sends projections back to the amygdala (Cavada *et al.*, 2000). The anatomical connectivity of the OFC gives it the potential, like the amygdala, to integrate sensory information from diverse sources, to modulate sensory and other cognitive processing via feedback connections, and to influence motor and autonomic output responses. Thus, our (unpublished) findings of abnormal autonomic responses during fear conditioning of Turner syndrome subjects, and the evidence that autonomic reactivity is also abnormal in high-functioning autistic individuals (Hirstein *et al.*, 2001), pointed to these two anatomical regions (the amygdala and the OFC) as being

potentially abnormal in terms of structure and/or function in Turner syndrome.

Deficits in social cognition in particular are highly variable in apparently non-mosaic X-monosomic individuals (45,X) when measured by conventional rating scales or interviews. Functional compensation has been described in autistic individuals of high intelligence (Teunisse and de Gelder, 2001), and recent imaging studies indicate that there is considerable variability in neural organization among such autistic probands (Grelotti *et al.*, 2002). Because of the variability in the cognitive and behavioural phenotype of 45,X females, we hypothesized that structural brain changes might be more consistently abnormal than behavioural deficits of social cognitive skills, relative to normal 46,XX females. For example, by parental report >30% of Turner syndrome children made poor eye contact in social conversation, a proportion at least 6 times greater than the proportion displayed more overtly autistic behaviours.

### **Deletion-mapping genes on the X-chromosome**

Phenotypic features of the Turner syndrome, relating to neural dysfunction, are due in large part to haploinsufficiency for X-linked gene products that are normally expressed in two copies from genes that escape X-inactivation in normal 46,XX females (Ross *et al.*, 2002). Males are also potentially haploinsufficient for these gene products, because few X-linked genes that escape inactivation outside the PARs at the tips of the X-chromosome have expressed Y-homologues (Disteche, 1999). Accordingly, we reasoned that it should be possible, through a study of individuals with X-chromosomal anomalies, to map dosage-sensitive genes that influence sexually dimorphic cognitive abilities. This hypothesis has received considerable recent support from other species in terms of both theory (Zechner *et al.*, 2001) and empirical evidence (Xu *et al.*, 2002). Because of the predisposition for 45,X females to show autistic features of behaviour, we hypothesized that dosage-sensitive genes that contribute to this aspect of their phenotype may also explain male vulnerability to the development of disorders of social cognition (Baron-Cohen, 2002), in view of the fact that males, like Turner syndrome females, possess only a single X-chromosome.

Accordingly, we aimed to identify dosage-sensitive X-linked genetic loci that influence the structure and function of neural systems affecting social-cognitive development, through a deletion-mapping strategy based on a study of brain structural and functional phenotypes in females with variably sized deletions of the X-chromosome. The technique of deletion-mapping has been used before to map genes on the X-chromosome that contribute to the Turner syndrome (Rao *et al.*, 1997). Small numbers of subjects are invariably used, because naturally occurring deletions of part of the X-chromosome are rare. Such deletions are usually terminal and affect the short arm of the X (known as Xp). Rarely, they are interstitial, meaning there is loss of material intermediate

between the centromere of the chromosome and the telomere at the tip of the arm.

Very small, distal deletions in the PAR on Xp (the region is described as pseudoautosomal because it combines with the Y-chromosome's equivalent region during meiosis) are associated with a mild phenotype which affects mainly stature (James *et al.*, 1998). The PAR extends across ~2.5 Mb of DNA from the telomere of the short arm. Genes in this region have homology to the equivalent region of the Y-chromosome. They are expressed from both X-chromosomes normally and are dosage-sensitive. So, if one copy is mutated or missing because of a microdeletion, there will be an abnormal phenotype which usually affects stature preferentially. The only gene that certainly contributes to the Turner phenotype was mapped this way (*SHOX*); it was mapped to the PAR of the short arm of the X-chromosome by a study of 16 patients (Rao *et al.*, 1997). The location of the gene was identified by a detailed molecular genetic investigation of just three crucial cases. *SHOX* is needed in two copies for normal development in stature. Individuals in whom it was deleted were excessively short relative to their parents' heights.

*SHOX* was deletion-mapped in the following way. First, the order of unique genetic markers (essentially way-points) in the PAR of the X-chromosome was determined. It was then necessary to find a sample of individuals with variably sized deletions within this critical region, some of whom were short and others of whom had normal stature. By a comparison of the chromosomal breakpoints (as implied by the presence or absence of markers) among individuals who had a deletion but an apparently normal phenotype, and those with the short stature phenotype, the approximate location of the gene could be determined.

This task is not straightforward, for it is rarely possible to state with precision exactly where a break has occurred. Markers may be spaced several kilobases of DNA from one another, and even their correct order on the chromosome may be a matter of debate. Confirmation of a suspected candidate gene usually requires the ascertainment of a mutation in that gene in other individuals with the phenotype, but who have intact chromosomes. This confirmation was achieved in the case of *SHOX*, and suggested that a mutation in this gene could account for many cases of idiopathic short stature in the general population (Blaschke and Rappold, 2001).

Much larger deletions, which extend from the telomere of the Xp to the region for microphthalmia with linear skin defects (*MLS*), which is ~14 Mb from the telomere, are compatible with the abnormal X remaining active. This is important because patients with Xp deletions distal to Xp22.3 will be nullisomic for genes that are subject to X-inactivation and lie distal to the *MLS* gene. In other words, patients with shorter terminal deletions of the X-chromosome that end proximal to the *MLS* gene are likely to have a more severe phenotype than those with even greater deletions. Because of this complexity, deletion mapping within the region between the PAR and the *MLS* genes is exceptionally difficult.

**Table 1** Details of chromosomal breakpoints, X-inactivation status and phenotypic characteristics of 13 females with partial deletions of Xp (46, XXp-)

|             | Karyotype                         | Age (years) | Cyto-genetic break-point | Deletion       | Parental origin of deleted X-chromosome | Cells in which the abnormal X is active (HUMAR/BrDU) (%) | Ascertain-ment                                  | Most proximal deleted marker (minimum size) | Most distal heterozygous marker (maximum size) | Verbal IQ | Perform-ance IQ | Ovarian failure     | Short stature |
|-------------|-----------------------------------|-------------|--------------------------|----------------|-----------------------------------------|----------------------------------------------------------|-------------------------------------------------|---------------------------------------------|------------------------------------------------|-----------|-----------------|---------------------|---------------|
| 97-05436/1  | 45,X[3]/46,X,del(X)(p22.32) [27]  | 9.0         | p22.32                   | <i>De novo</i> | Paternal                                | 64/not done                                              | Short stature                                   | –                                           | DXYS230X                                       | 107       | 81              | Too young to assess | Yes           |
| 88-04577/2  | 46,X,t(X;Y)(p22.31;q11.21)        | 24.25       | p22.31                   | <i>De novo</i> | Paternal                                | 69/58                                                    | Short stature                                   | DXS8105                                     | DXS996                                         | 103       | 99              | No                  | Yes           |
| 95-02697/3  | 46,X,t(X;Y)(p22.31;q12)           | 11.1        | p22.33                   | Familial       | Maternal                                | 34/33                                                    | Turner syndrome                                 | DXS7470                                     | DXS7103                                        | 76        | 78              | Too young to assess | Yes           |
| 96-00284/4  | 46,X,t(X;Y)(p22.33;q12)           | 48.9        | p22.33                   | <i>De novo</i> | Paternal                                | 05/12                                                    | Mother of case                                  | DXS7470                                     | DXS7103                                        | 101       | 93              | No                  | Yes           |
| 00-10093/5  | 46,X,del(X)(p22) inv(3) q21q26.1  | 16.4        | P22                      | <i>De novo</i> | Paternal                                | 0/0                                                      | Short stature                                   | DXS8378                                     | DXS207                                         | 130       | 112             | Partial             | Yes           |
| 85-05142/6  | 46,X,del(X)(p22.1)                | 29.10       | p22.12                   | <i>De novo</i> | Paternal                                | 0/0                                                      | Short stature                                   | DXS43                                       | DXS8036                                        | 101       | 101             | No                  | Yes           |
| 95-4247/7   | 45,X[33]/46,X,del(X)(p21.2) [17]  | 25.4        | p21.2                    | <i>De novo</i> | Paternal                                | 0/0                                                      | Turner Syndrome                                 | DXS985                                      | DXS1036                                        | 105       | 85              | No                  | Yes           |
| 95-1115/8   | 46,X,del(X)(p11.33)               | 38.6        | p11.33                   | Familial       | Maternal                                | Not done/0                                               | Known del (X)                                   | DXS1368                                     | DXS993                                         | 103       | 100             | No                  | Yes           |
| 98-02702/9  | 46,X,del(X)(p11.2)                | 37.5        | p11.2                    | <i>De novo</i> | Paternal                                | 0/0                                                      | Daughter of affected female                     | DXS8026                                     | DXS8083                                        | 109       | 109             | No                  | No            |
| 90-02284/10 | 46,X,del(X)(p11)                  | 14.6        | p11                      | <i>De novo</i> | Paternal                                | 0/0                                                      | Problems with IVF                               | DXS1367                                     | DXS1208                                        | 108       | 92              | No                  | Yes           |
| 96-00863/11 | 46,X,del(X)(p11.2)                | 16.9        | p11.2                    | <i>De novo</i> | Paternal                                | Not done/0                                               | Short stature, some stigmata of Turner syndrome | DXS8024                                     | DXS8062/ DXS423E                               | 91        | 80              | No                  | Yes           |
| 75-00857/12 | 45,X[45]/46,X,del(X)(p11) [55]    | 46.5        | p11.2                    | <i>De novo</i> | Paternal                                | 0/0                                                      | Turner syndrome                                 | DXS8023                                     | DXS8032                                        | 95        | 83              | Yes                 | Yes           |
| 95-02770/13 | 46,X,der(X)(qter>p11.2::q26>qter) | 14          | p11.2                    | <i>De novo</i> | Paternal                                | Not done/0                                               | Turner syndrome                                 | 423E (FISH probe)                           | DXS1199                                        | 93        | 46              | Yes                 | Yes           |

Our interest was primarily in a region close to the centromere on Xp (Xp11.3), in which there is a cluster of genes that escape X-inactivation and which are therefore presumably needed in two copies for the normal development of females (Disteche, 1999). We hypothesized that at least some aspects of the Turner cognitive or behavioural phenotype could be associated with haploinsufficiency of genes in this region. Fortunately, terminal deletions of the X that extend as far as Xp11.3, beyond the *MLS* gene, are invariably associated with preferential inactivation of the abnormal X-chromosome (James *et al.*, 1998). Thus, interpretation of phenotypic data from a comparison of females with variably sized deletions in this region should be relatively straightforward, on the basis of the hypothesis that phenotypes found in larger deletions will be associated with haploinsufficiency of genes that are normally required in two copies.

### Imprinting of X-linked genes

We had previously reported evidence (Skuse *et al.*, 1997) that one or more X-linked loci that affect cognitive function are imprinted, in the sense that only the allele that is paternally inherited is expressed. The proposed mechanism entailed the systematic silencing of the imprinted locus on the X-chromosome in the maternal germ-line and the removal of imprints in the paternal germ-line. Accordingly, the expressed locus would invariably be passed from father to daughter (and would be expressed in her). The silent locus would be inherited by sons from their mothers, on their single X-chromosome, and also by daughters. The consequence of this proposed mechanism was a system for determining the expression of sexually dimorphic traits that could operate independently of sex steroids. We had found evidence for its existence by contrasting the cognitive and behavioural profiles of X-monosomic females, whose single X was derived either maternally (45,X<sup>m</sup>) or paternally (45,X<sup>p</sup>). In general, 45,X females with a single paternal X-chromosome had better social adjustment than those whose single X was maternal in origin. Autistic features were significantly more common among those with a maternally derived X-chromosome, and autism was only found in 45,X<sup>m</sup> females (Skuse *et al.*, 1999; Skuse, 2000). Accordingly, we predicted that we would find differences in structures that are important for social cognition between 45,X<sup>m</sup> and 45,X<sup>p</sup> Turner females.

### Hypotheses

Prior to the neuroimaging study presented here we proposed the following hypotheses. (i) Abnormalities in the structure of the amygdala and OFC would be present in women with Turner syndrome (45,X) compared with normal females (46,XX) in adulthood. (ii) In females with partial deletions of one X-chromosome (46,XXp-), loss of a genetic locus in the Xp11.3 region would be associated with many typical

neurocognitive deficits of Turner syndrome. In 46,XXp- females whose critical region was deleted there would be structural brain anomalies similar to those of 45,X Turner syndrome, when compared with 46,XX adult females. (iii) There would be structural differences in brain regions important for social cognition between women with X-monosomic Turner syndrome whose single X-chromosome was maternally inherited (45,X<sup>m</sup>) and those with a paternally inherited single X-chromosome (45,X<sup>p</sup>).

## Material and methods

### Subjects

This study, which was approved by the Ethics Committee of Great Ormond Street Hospital for Children and the Institute of Child Health, involved 64 females with X-chromosome anomalies (51 with Turner syndrome 45,X, aged 15–44 years, and 13 with partial X-chromosome deletions (46,XXp-), aged 9–52 years.). All were selected on the basis that they had no significant learning difficulties. Forty per cent had participated in some form of higher education and 20% had attended university. The subjects' consent was obtained according to the Declaration of Helsinki. Clinical subjects were selected from a national survey of Turner syndrome and from the records of the Wessex Regional Genetics Laboratory. The mean (SD) age of the 45,X females was 25.1 (7.1) years and that of the 46,XXp- females was 26.4 (13.2) years. The mean (SD) verbal IQ of the 45,X and 46,XXp- females was similar [96.9 (13.3) versus 101.6 (12.3)], as was their performance IQ [90.3 (16.0) versus 91.0 (17.6)]. All subjects were healthy, with no significant neurological disease. All 45,X women had been receiving sex steroid replacement therapy since early adolescence. The comparison group of 45 normal 46,XX women (recruited from staff and students at Great Ormond Street Hospital for Children and the Institute of Child Health) was matched to the 45,X group in terms of mean age [24.1 (SD 4.6) years] and verbal IQ (Wechsler, 1986) [100.9 (11.7)]. Their mean performance IQ of 108.1 (14.4) was significantly greater than that of 45,X females, ( $P < 0.001$ ), as expected (Temple and Carney, 1995). Our comparison group of 25 normal 46,XY males was recruited from the same volunteer sample as normal females.

### Genetic methods

Karyotypes were determined by analysis of G-banded metaphase chromosomes harvested from peripheral blood. DNA for molecular studies was extracted by salt precipitation. Parental origin of the normal X-chromosome was determined using the PCR to amplify DNA polymorphisms from each proband and their parents.

Our sample of 13 46,XXp- females had variably sized breakpoints, all but one terminal, which ranged in size from 5 to 55 Mb from the telomere. For the purpose of analysis they were numbered 1–13 in increasing size of deletion (Table 1).

Deletion breakpoints (James *et al.*, 1998) were mapped by PCR using a panel of short tandem-repeat polymorphisms spanning the X-chromosome short arm. In Table 1 the laboratory numbers of the subjects correspond to the numbers used by James and colleagues, and fuller information is given about the phenotypic characteristics of many partially deleted subjects there (James *et al.*, 1998). Locus order was taken from Ensembl (<http://www.ensembl.org/>). Standard PCR conditions were used throughout and all primer sequences are available through the Genome Database (<http://gdbwww.gdb.org/>). The X-inactivation status of a deleted X-chromosome was determined at the androgen receptor locus (*HUMAR*). In deletions 5–13, the abnormal X was unilaterally inactivated. In order to detect possible mosaicism, a minimum of 50 cells per individual (usually 100 cells) were analysed cytogenetically. All 45,X females were apparently non-mosaic in peripheral blood, although this does not exclude the presence of an additional cell line in the brain. Among the deletion carriers, a 45,X cell line was also present in three cases: Case 1 (10% of cells), Case 7 (66% of cells) and Case 12 (45% of cells). Thus, these three cases have an X-chromosome complement intermediate between monosomic 45,X females and normal females.

### Structural neuroimaging

In order to characterize the brain structural phenotypes we performed high-resolution MRI structural imaging (Deichmann *et al.*, 2000) and voxel-based morphometry (Ashburner and Friston, 2000) on 21 45,X subjects and all subjects with partial deletions. This fully automated whole-brain imaging technique enables detection of subtle changes in grey matter on a voxel-wise basis between groups of patients and normal subjects. Classical MRI morphometric techniques are based upon region-of-interest-type metrics, which are inherently subjective and operator-dependent, perhaps explaining inconsistencies in previous descriptions of the structural phenotype of the brain in Turner syndrome (Murphy *et al.*, 1993; Reiss *et al.*, 1995).

High-resolution volumetric MRI was performed on a Siemens 2 T Magnetom scanner using an optimized MPRAGE (magnetization-prepared, rapid gradient echo) sequence, which affords enhanced grey/white matter contrast and segmentation (Deichmann *et al.*, 2000). The acquisition parameters included TR-repetition time 11; TE-echo time 4; TI-inversion time 1000; flip angle 12°; matrix 256 × 224; field of view 256 × 224 mm; 176 sagittal slices and 1 mm isotropic voxels. An optimized method of voxel-based morphometry (Good *et al.*, 2001b) was used, which involves a number of fully automated preprocessing steps: extraction of brain; spatial normalization into stereotaxic space; segmentation into grey and white matter and CSF compartments; correction for volume changes induced by spatial normalization; and smoothing with a 10 mm full width at half maximum isotropic Gaussian kernel. After smoothing, each voxel represents the local average amount of grey (or white)

matter in the surrounding region, the size of which is defined by the size of the smoothing kernel. We used a customized grey matter template derived from all the Turner syndrome patients and control subjects in order to avoid any bias during the spatial normalization step. The smoothed data were analysed using Matlab 5.3 (MathWorks, Natick, MA, USA) and statistic parametric mapping (SPM99) employing the framework of the general linear model.

Regionally specific structural differences were assessed statistically using a two-tailed test, testing for increased or decreased grey matter. Corrections for the search volume and implicit multiple comparisons were made to the *P* values using Gaussian random field theory, which accommodates spatial correlations inherent in the data. Significance levels were set at *P* < 0.05, corrected for whole brain volume. Because the amygdala had been identified *a priori* as a possible candidate for structural change, amygdala changes were corrected for small volume using a sphere of diameter 40 mm as a generous estimate of total amygdala volume. The design matrix modelled the control group, the 45,X group (divided according to the maternal or paternal origin of the single X-chromosome) and individual partial deletions arranged in order of the number of megabases missing from the short arm of the X-chromosome. The mean global grey matter intensity was modelled as a covariate in order to facilitate the detection of regionally specific structural changes, having discounted global differences. Age was included as a covariate. In a separate analysis we compared normal males, normal females and 45,X females with mean global grey matter and age as covariates.

### Neuropsychological tests

Standard tests of verbal and non-verbal IQ were employed, using the Wechsler scales (Wechsler, 1986). Because we had hypothesized that the social adjustment problems associated with Turner syndrome (McCauley *et al.*, 1987; Ross *et al.*, 2000) could be linked to amygdala dysfunction, subjects were tested using the Ekman Pictures of Facial Affect (Ekman and Friesen, 1976). Poor performance in the recognition of basic emotions has been specifically linked to amygdala dysfunction (Adolphs *et al.*, 2002). Sixty pictures of male and female faces were shown to subjects, who had to decide which emotion was being conveyed by the facial expression: happiness, sadness, fear, surprise, anger or disgust. Fifty-one 45,X individuals were compared with 45 normal 46,XX females matched for age and verbal IQ, and 25 normal 46,XY males.

## Results

### Neuropsychological tests

Scores for the six emotions on the Ekman pictures (Ekman and Friesen, 1976) were entered into a MANOVA (multivariate analysis of variance), covarying for performance IQ,

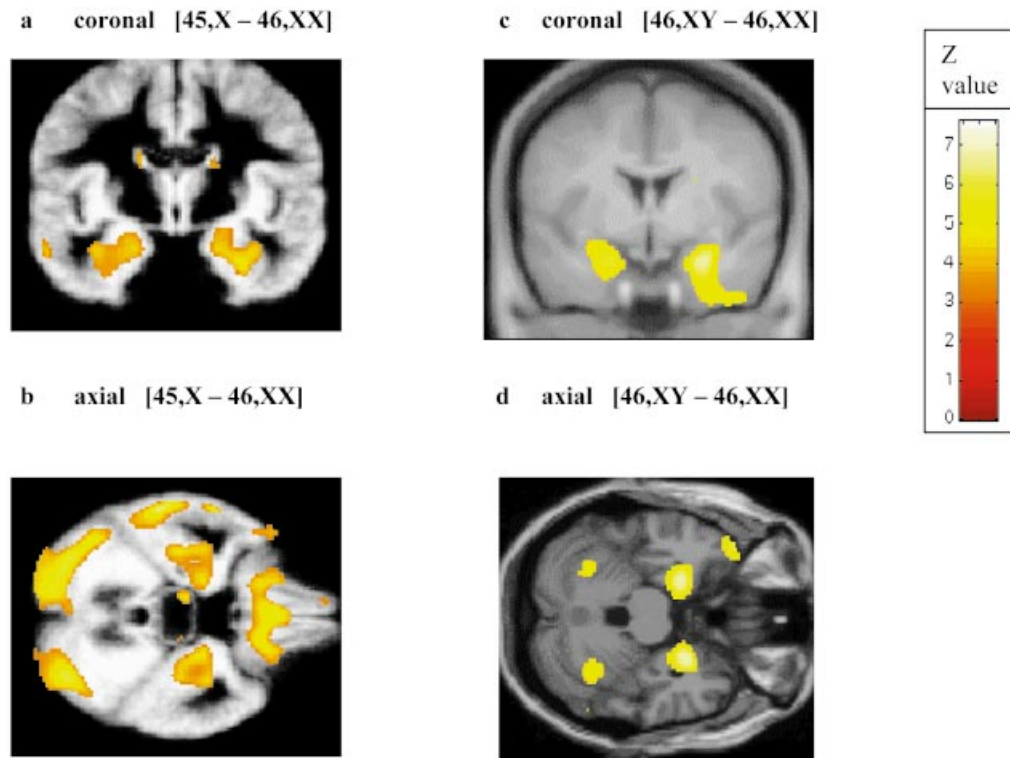

**Fig. 1** Structural differences in grey matter volume, demonstrated by voxel-based morphometry. **(a and b)** Comparison between 45,X Turner syndrome females and normal 46,XX females. Increased grey matter is seen bilaterally in the amygdala and OFC of the Turner syndrome sample. Significance levels were set at  $P < 0.05$ , corrected. Local maxima coordinates for amygdala:  $-37 -12 -24$ ;  $-34 -6 -25$ ;  $21 -10 -24$ ;  $33 -6 -24$ . **(c and d)** Comparison between 46,XX females and normal 46,XY males. Increased grey matter is seen bilaterally only in the amygdala in the male sample. Significance levels were set at  $P < 0.05$ , corrected for whole brain volume in Good *et al.* (2001a). Local maxima coordinates:  $-20 -3 -24$ ;  $-29 -9 -25$ ;  $27 -2 -28$ ;  $33 -6 -25$ . The magnitude of effect in our smaller study sample was similar, but the statistical significance was lower. Differences in the amygdalar coordinates partly reflect the different customized templates used for the Turner syndrome and Good *et al.* (2001a) normal sex difference voxel-based morphometry analyses.

with Bonferroni correction. The 45,X females were substantially impaired in recognizing fear ( $P < 0.0001$ , effect size = 1.3) and anger ( $P < 0.006$ , effect size = 1.0) relative to 46,XX females (Fig. 2), but they were unimpaired in the recognition of other facial emotions. None was aware of their perceptual deficit. They could provide plausible situations in which fear or anger might be experienced, but many could not recount times when they themselves had experienced these emotions. No significant differences were found in performance on these tasks between 45,X females whose single X-chromosome was maternal and those in whom it was paternal in origin. Face emotion perception was similar in normal females and an age- and IQ-matched sample of 16 normal males. Males lacked the fear recognition deficit of 45,X females, despite their single X-chromosome.

### Structural neuroimaging

We selected 21 apparently non-mosaic Turner syndrome females with a 45,X karyotype (45,X females), 17 age- and

verbal IQ-matched control females [25 (SD) 9.0 years] and all 25 age-matched normal males [27.1 (8.1) years] for neuroimaging investigations. Eleven of the 45,X females had a single X-chromosome of maternal origin (45,X<sup>m</sup>) [mean (SD) age 24.3 (7.5) years] and in 10 cases it was of paternal origin (45,X<sup>p</sup>) [22.3 (6.4) years].

In keeping with our hypotheses, we found that X-monosomic females possessed localized regions of altered brain structure compared with 46,XX controls. These abnormalities included significantly increased grey matter volumes of the amygdalae and OFC bilaterally (Fig. 1). Previous studies have shown gender differences in the amygdala structure of normal subjects; males (46,XY) have increased grey matter compared with females (over and above the global grey matter differences between the sexes) (Murphy *et al.*, 1993; Good *et al.*, 2001a). However, no sex differences have been reported in the OFC grey matter in this region. We compared matched samples of normal males with 46,XX and 45,X females and found that, although males did have larger amygdalae than normal females ( $P < 0.001$  uncorrected), the

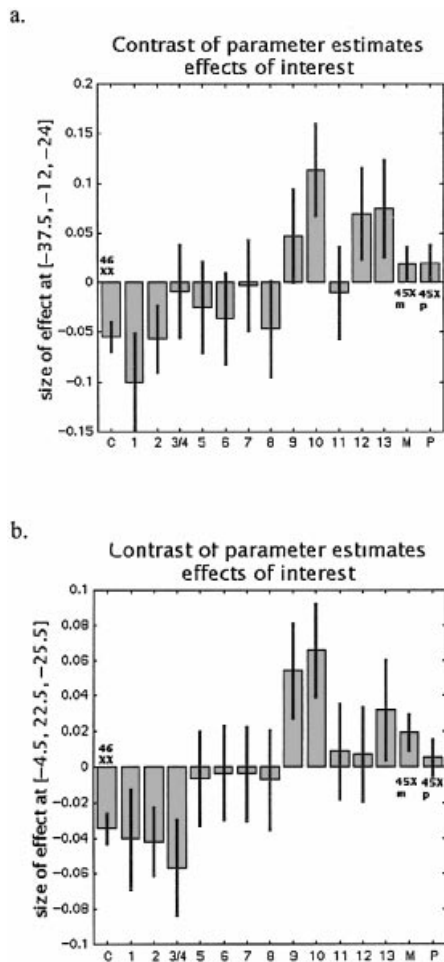

**Fig. 2** Individual and group differences in grey matter, in (a) the amygdala and (b) the OFC, from voxel-based morphometry of brain images. The coordinates ( $x, y, z$ ) at the voxel of maximal effect are shown on the vertical axis. Mean values ( $\pm 2$  standard errors) are given, relative to the grand mean, for 17 46,XX females designated by C. Eleven 45,X<sup>m</sup> females (maternal X-chromosome only) are designated by M and 10 45,X<sup>p</sup> females (paternal X-chromosome only) are designated by P. At positions 1–13, data for 13 individual Xp deletion subjects (46,XXp–) are given in order of increasing size of deletion from the telomere, from left to right. (There are two individuals at position 3/4 with identical deletions: a mother and daughter.) There are substantial grey matter differences between subjects 8 and 9 in both the amygdala and the OFC. The units of our response variable are adimensional probabilities pertaining to the proportion of brain tissue in the region that is grey matter. The magnitude of contrast between individual values or group means can easily be calculated. For example, in the amygdala at coordinates  $-37.5, -12, -24$ , the difference between normal subjects ( $-0.05$ ) and Turner syndrome patients ( $0.02$ ) is  $-0.07$ , corresponding to a 7% difference in grey matter volume.

amygdalae of 45,X females were larger still ( $P < 0.05$  corrected) (Fig. 1). Therefore a dose–response relationship seems plausible between the expression of one or more X-linked genes that escape inactivation (and which lack Y-homologues) and the structural development of the

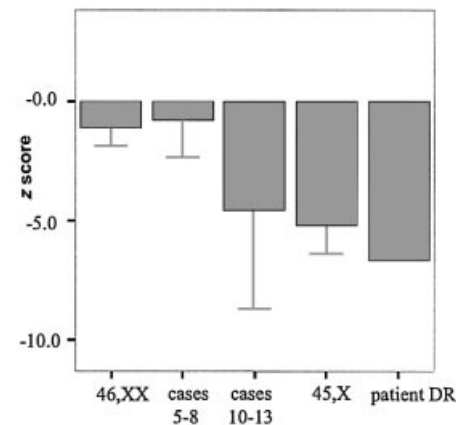

**Fig. 3** Recognition of fear in facial expressions. Mean ratings of fear recognition for subject groups. Bars indicate 2 standard errors. Data are presented as standard deviation scores below population norms. The fear recognition skills of normal 46,XX females ( $n = 56$ ) and 46,XXp– females with deletions that extend no further than DXS1058 (Cases 5–8 in Fig. 2) are similar. Case 9 possessed similar fear recognition skills to Cases 5–8 despite having a brain phenotype identical to Cases 10–13. 46,XXp– females with deletions extending beyond DXS8083 (Cases 10–13 in Fig. 2) are less accurate in fear recognition than 46,XX controls ( $P < 0.005$ , effect size = 1.5). The fear recognition skills of 45,X ( $n = 51$ ) and 46,XXp– females with these larger deletions do not differ significantly. Patient D.R. (who underwent bilateral amygdectomy) was tested on the same fear recognition task, and the magnitude of her fear recognition deficit was similar to that of 45,X females.

amygdala. Contrary to our hypothesis, we did not find any significant differences in amygdala or OFC structure according to the parental origin of the single X-chromosome.

There was no gender difference in OFC grey matter volume or density. Thus, the increased grey matter volume of the OFC in Turner syndrome individuals was seen relative to both males and females from our comparison groups.

### **Deletion-mapping the critical region on X-chromosome, using cognitive and neuroimaging phenotypes**

Using our 46,XXp– subjects (Table 1), we attempted to map the putative dosage-sensitive locus with the structural brain phenotype as our outcome variable. Subjects with breakpoints including or proximal to the locus DXS8083 (44.07 Mb from Xpter), were phenotypically similar to 45,X females in terms of brain structure, with significantly increased grey matter in the amygdala and OFC (Fig. 2). In contrast, these brain structures were indistinguishable from normal in 46,XXp– females with breakpoints distal to the locus DXS1368 (39.11 Mb from Xpter). Subjects with partial deletions had fear recognition skills that closely mirrored their brain phenotypes, in the sense that those with no increased volume of OFC or amygdalae also possessed normal fear recognition, whereas in general those with abnormal OFC and amygdala



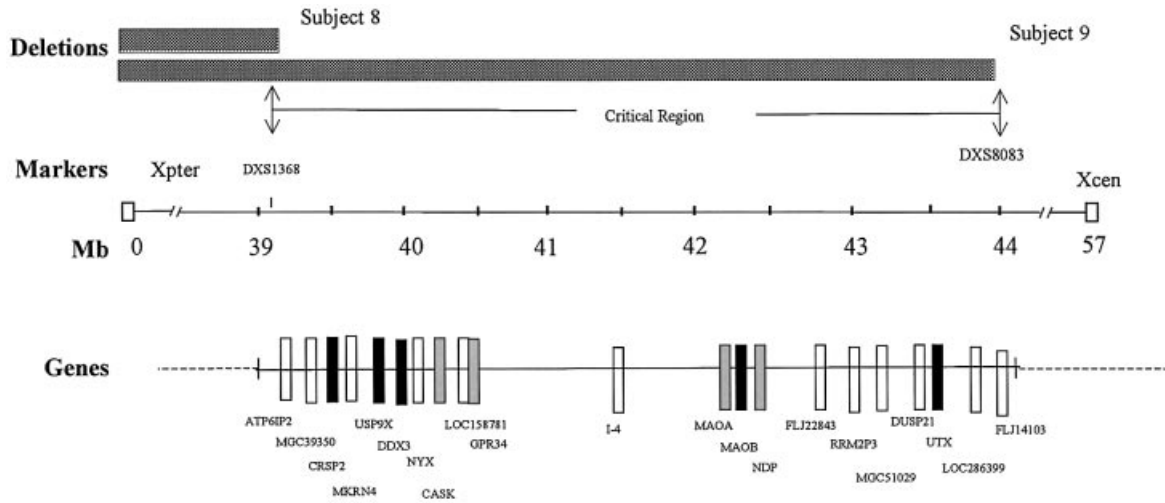

**Fig. 4** Schematic view of the Xp11.3–Xp11.4 region. Distances in Mb are given from Xpter. Locus order and distances from Entrez *Homo Sapiens* Genome View (Build 33). Only confirmed genes are shown (additional properties given in Table 2). Genes are shaded according to their inactivation status. No shading indicates this is unknown. Black indicates genes that escape inactivation; grey indicates genes that are inactivated.

volumes had a deficit in their ascertainment of fear, irrespective of the parental origin of their deletion (Fig. 3). No other aspect of cognitive or somatic phenotype differentiated females with deletions that extended beyond the critical region from the remainder (Table 1).

No correlation existed between menstrual history, or other evidence of ovarian failure, and amygdala structure or fear recognition skills in partial deletion subjects. The 46,XXp–female with a deletion to DXS8083 (Subject 9) had conceived spontaneously, and two subjects with larger deletions (Subjects 10 and 11) had normal menstrual histories. Accordingly, oestrogen deficiency is unlikely to be directly responsible for abnormalities of brain structure and function among the 46,XXp– sample.

### Molecular genetic studies

These findings suggest that a dosage-sensitive locus influencing both amygdala and OFC development in 45,X females lies in the interval between 39.11 and 44.07 Mb from the telomere of the short arm (Fig. 4). This critical region is defined by loci DXS1368 (distally) and DXS8083 (proximally) and must contain one or more genes which escape X-inactivation, and are thus needed in two copies in 46,XX females for typical development to occur. Genes escaping X-inactivation tend to exist in clusters and, significantly, at least one cluster maps within the DXS1368–DXS8083 interval (Carrel *et al.*, 1999; Disteche, 1999; Sudbrak, 2001). Within this 4.96 Mb interval there are 21 confirmed genes (Table 2, Fig. 4). There are also 26 genes predicted with varying degrees of confidence of which 16 have expressed sequence tags. There is a block of homology between this

region of the X-chromosome, corresponding to cytogenetic bands Xp11.3 and Xp11.3, and a non-recombining part of the Y chromosome, Yp11.2. Of the X-linked genes in our critical region that are known to escape X-inactivation, only USP9X, DDX3 and UTX have functional Y-homologues and all three are expressed in (mouse) brain (Xu *et al.*, 2002). Completion of the human genome sequencing project and more extensive gene annotation may identify additional X/Y gene pairs.

### Neurochemical studies

Among the genes in this critical region are those encoding monoamine oxidase A (MAOA) and monoamine oxidase B (MAOB). These are nuclear-encoded mitochondrial isoenzymes that catalyse the oxidative deamination of a number of biogenic amines, including the neurotransmitters serotonin (5-HT), norepinephrine and dopamine, and the neuromodulator phenylethylamine. Both enzymes have been implicated in predisposition to a range of psychiatric disorders (Shih and Thompson, 1999) and both genes are expressed in the human amygdala. MAOB is also expressed in platelets, in which activity levels are believed to reflect genotypic variation. Methylation analysis of the MAOB 5' CpG island has found that all CpG dinucleotides tested in DNA extracted from lymphocytes are unmethylated on both the active (Xa) and inactive (Xi) X-chromosomes (Chen *et al.*, 1992). This suggests the gene is expressed from both X-chromosomes in normal females and is not subject to X-inactivation. There is no functional Y-homologue of MAOB (males in whom it is deleted have no measurable MAOB activity). Accordingly, we hypothesized that males and 45,X females could be haploinsufficient for the gene products, relative to normal

**Table 2** Genes identified in critical region at Xp11.3-Xp11.4 between markers DXS1368 and DXS8083; Entrez Homo Sapiens Genome View (Build33)

| Start (Mb from telomere of Xp) | Length (Mb) | Symbol    | Orientation | X-inactivation status <sup>+</sup> | Description | Position on chromosome | Function                                                                                                                                                                                                   |
|--------------------------------|-------------|-----------|-------------|------------------------------------|-------------|------------------------|------------------------------------------------------------------------------------------------------------------------------------------------------------------------------------------------------------|
| 39109188                       |             | DXS1368   |             |                                    |             | Xp11.4                 | Marker at most distal point of critical region                                                                                                                                                             |
| 39219219                       | 55007       | LOC349369 | +           |                                    | P           | Xp11.4                 | Similar to 40S ribosomal protein S20                                                                                                                                                                       |
| 39284736                       | 25734       | ATP6IP2   | +           |                                    | C           | Xq21                   | ATPase, H <sup>+</sup> transporting, lysosomal interacting protein 2                                                                                                                                       |
| 39326591                       | 1236        | LOC347411 | +           |                                    | PE          | Xp11.4                 | Similar to agCP12752 [Anopheles gambiae str. PEST]                                                                                                                                                         |
| 39332884                       | 18521       | MGC39350  | –           |                                    | C           | Xp11.4                 | Hypothetical protein MGC39350                                                                                                                                                                              |
| 39352157                       | 87552       | CRSP2     | –           | Escapes                            | C           | Xp11.4-p11.2           | Cofactor required for Sp1 transcriptional activation, subunit 2, 150 kDa                                                                                                                                   |
| 39462396                       | 422         | LOC349370 | +           |                                    | P           | Xp11.4                 | Similar to Homeobox protein goosecoid                                                                                                                                                                      |
| 39463830                       | 1292        | LOC349371 | –           |                                    | P           | Xp11.4                 | Similar to claudin 7; Clostridium perfringens enterotoxin receptor-like 2; claudin 9                                                                                                                       |
| 39486276                       | 50603       | LOC347412 | –           |                                    | PE          | Xp11.4                 | Similar to fetal liver LKB1-interacting protein                                                                                                                                                            |
| 39537995                       | 3668        | MKRN4     | +           |                                    | C           | Xp21.1                 | Makorin, ring finger protein, 4                                                                                                                                                                            |
| 39593720                       | 1543        | LOC158777 | –           |                                    | E           | Xp11.4                 | Similar to Syntenin 1 (Syndecan binding protein 1) (Melanoma differentiation associated protein-9) (Mda-9) (Scaffold protein Pbp1) (Pro-TGF- $\alpha$ cytoplasmic domain-interacting protein 18) (TACIP18) |
| 39638791                       | 935         | LOC286444 | –           |                                    | I           | Xp11.4                 | Similar to ribosomal protein S2; 40S ribosomal protein S2                                                                                                                                                  |
| 39789348                       | 2358        | LOC352782 | –           |                                    | PE          | Xp11.4                 | No information available                                                                                                                                                                                   |
| 39827422                       | 109363      | USP9X     | +           | Escapes                            | C           | Xp11.4                 | Ubiquitin specific protease 9, X chromosome (fat facets-like Drosophila)                                                                                                                                   |
| 39953887                       | 19265       | LOC139914 | +           |                                    | P           | Xp11.4                 | Similar to RAN, member RAS oncogene family                                                                                                                                                                 |
| 39979859                       | 88464       | LOC347415 | –           |                                    | PE          | Xp11.4                 | No information available                                                                                                                                                                                   |
| 40037250                       | 31073       | DDX3      | +           | Escapes                            | C           | Xp11.3-p11.23          | DEAD/H (Asp-Glu-Ala-Asp/His) box polypeptide 3                                                                                                                                                             |
| 40151286                       | 28276       | NYX       | +           |                                    | C           | Xp11.4                 | Nyctalopin                                                                                                                                                                                                 |
| 40223061                       | 403806      | CASK      | –           | Inactivated                        | C           | Xp11.4                 | Calcium/calmodulin-dependent serine protein kinase (MAGUK family)                                                                                                                                          |
| 40377704                       | 2654        | LOC158781 | –           |                                    | C           | Xp11.4                 | Tyrosine 3-monooxygenase/tryptophan 5-monooxygenase activation protein, zeta pseudogene                                                                                                                    |
| 40392843                       | 8282        | GPR34     | +           | Inactivated                        | C           | Xp11.4-p11.3           | G protein-coupled receptor 34                                                                                                                                                                              |
| 40802660                       | 7662        | LOC139497 | –           |                                    | PE          | Xp11.4                 | Similar to ATP synthase, H <sup>+</sup> transporting, mitochondrial F0 complex, subunit c (subunit 9) isoform 3                                                                                            |
| 40854363                       | 51160       | LOC139496 | –           |                                    | P           | Xp11.4                 | Similar to ribosomal protein S4, X-linked                                                                                                                                                                  |
| 41025788                       | 307346      | LOC347416 | +           |                                    | PE          | Xp11.4                 | No information available                                                                                                                                                                                   |
| 41419377                       | 59370       | LOC347417 | –           |                                    | PE          | Xp11.4                 | No information available                                                                                                                                                                                   |
| 41481218                       | 867         | I-4       | –           |                                    | C           | Xp11.4-Xp11.3          | Type 1 protein phosphatase inhibitor                                                                                                                                                                       |
| 41510697                       | 140230      | LOC352783 | +           |                                    | PE          | Xp11.4                 | No information available                                                                                                                                                                                   |
| 41982225                       | 1281        | LOC139334 | –           |                                    | P           | Xp11.4                 | Similar to Inosine-5-monophosphate dehydrogenase 1 (IMP dehydrogenase 1) (IMPDH-I) (IMPD 1)                                                                                                                |
| 42053614                       | 37389       | LOC352784 | +           |                                    | PE          | Xp11.4                 | No information available                                                                                                                                                                                   |
| 42111595                       | 807         | LOC349372 | –           |                                    | PE          | Xp11.4                 | Similar to hypothetical protein FLJ12581                                                                                                                                                                   |

Table 2 Continued

| Start (Mb from telomere of Xp) | Length (Mb) | Symbol    | Orientation | X-inactivation status <sup>a</sup> | Description | Position on chromosome | Function                                                                                              |
|--------------------------------|-------------|-----------|-------------|------------------------------------|-------------|------------------------|-------------------------------------------------------------------------------------------------------|
| 42172768                       | 44138       | LOC352785 | +           |                                    | PE          | Xp11.3                 | No information available                                                                              |
| 42261788                       | 98329       | LOC352786 | +           |                                    | PE          | Xp11.3                 | No information available                                                                              |
| 42360181                       | 70205       | MAOA      | +           | ?Inactivated                       | C           | Xp11.4-p11.3           | Monoamine oxidase A                                                                                   |
| 42452187                       | 115818      | MAOB      | –           | ?Escapes                           | C           | Xp11.4-p11.3           | Monoamine oxidase B                                                                                   |
| 42634355                       | 24724       | NDP       | –           | Inactivated                        | C           | Xp11.4                 | Norrie disease (pseudoglioma)                                                                         |
| 42714893                       | 2467        | LOC286398 | +           |                                    | I           | Xp11.3                 | Similar to Rnpc2 protein                                                                              |
| 42833458                       | 195789      | FLJ22843  | –           |                                    | C           | Xp11.3                 | Hypothetical protein FLJ22843                                                                         |
| 42994889                       | 1162        | RRM2P3    | +           |                                    | C           | Xp11.4                 | Ribonucleotide reductase M2 polypeptide pseudogene 3                                                  |
| 43146391                       | 12535       | LOC139339 | +           |                                    | P           | Xp11.3                 | Similar to ubinuclein 1                                                                               |
| 43161602                       | 1395        | LOC139340 | –           |                                    | PE          | Xp11.3                 | Similar to Farnesyl pyrophosphate synthetase (FPP synthetase) (FPS) (Farnesyl diphosphate synthetase) |
| 43209234                       | 19342       | MGC51029  | –           |                                    | C           | Xp11.3                 | Hypothetical protein MGC51029                                                                         |
| 43319331                       | 923         | LOC352787 | –           |                                    | PE          | Xp11.3                 | No information available                                                                              |
| 43331364                       | 63260       | LOC352788 | +           |                                    | PE          | Xp11.3                 | Similar to 60S ribosomal protein L19                                                                  |
| 43426586                       | 1019        | LOC158678 | +           |                                    | I           | Xp11.3                 | Similar to protein 40 kDa                                                                             |
| 43529579                       | 884         | DUSP21    | +           |                                    | C           | Xp11.4-p11.23          | Dual specificity phosphatase 21                                                                       |
| 43559086                       | 239086      | UTX       | +           | Escapes                            | C           | Xp11.2                 | Ubiquitously transcribed tetratricopeptide repeat gene, X chromosome                                  |
| 43833952                       | 5704        | LOC286399 | –           |                                    | C           | Xp11.3                 | Hypothetical protein LOC286399                                                                        |
| 43847896                       | 38579       | FLJ14103  | –           |                                    | C           | Xp11.3-p11.23          | Hypothetical protein FLJ14103                                                                         |
| 44067945                       |             | DXS8083   |             |                                    |             | Xp11.23                | Marker at most proximal point of critical region                                                      |

C = confirmed gene model; E = expressed sequence tag only; PE = predicted gene plus expressed sequence tag; P = predicted gene only; I = interim locus ID; <sup>a</sup>blank field implies activation status unknown

females, if upregulation of their single copy did not occur, and that 45,X females would show male-typical levels of activity.

We therefore conducted a further study specifically to test the hypothesis that the sexual dimorphism in platelet activity of MAOB could be due to haploinsufficiency of MAOB expression in males. This has not been investigated previously. We confirmed prior evidence that the platelet activity of MAOB is sexually dimorphic (e.g. Harro *et al.*, 2001), levels in males being ~30% lower than levels in normal females. We also showed, in a preliminary investigation (of non-smokers), that mean (SD) levels were almost identical in males and in Turner syndrome (45,X) [9.5 (1.1) and (9.7)  $\beta$ -phenylethylamine deaminated per  $10^{10}$  platelets per min nmol, respectively]. In contrast, mean (SD) normal female levels of MAOB activity were significantly higher [13.7 (1.4),  $P = 0.05$ ].

## Discussion

### Structural brain anomalies in Turner syndrome

The increase in the amygdala volumes of our 45,X subjects is consistent with previous studies that have found that amygdala volume correlates inversely with the number of X-chromosomes, irrespective of sex. Two studies (Goldstein

*et al.*, 2001; Good *et al.*, 2001a) have reported larger volumes among 46,XY males than 46,XX females. 47,XXY males have amygdalae of similar volume to 46,XX females, whereas the amygdalae of 47,XXX females are significantly smaller than those of either group (Patwardhan *et al.*, 2002). Individual nuclei within the amygdala subserve different functions, but we were unable, with the scanning resolution available to us, to determine whether these substructures were differentially affected.

The amygdala is a critical component of the social cognition circuitry in primates. Modular cognitive processes are devoted to making social judgements, and in particular our perception of facial expressions plays a critical role in social intelligence (Adolphs, 1999; Winston *et al.*, 2002). An influential neurobiological model of social cognition (Brothers, 1997) postulates that socially relevant information, processed by sensory and association cortices, is imbued with emotional significance by the amygdala and OFC. This model has received widespread support from research in both primates and humans (Amaral *et al.*, 2002). Lesion and functional imaging studies in humans have demonstrated its role in identifying emotions in others. Humans and primates with complete bilateral amygdala damage have difficulty

recognizing fear (and anger) in facial expressions and they demonstrate subtle abnormalities of normal social responsiveness (Adolphs *et al.*, 2002).

Healthy males, despite having a single X-chromosome and larger amygdalae than normal females, do not have deficits in their ability to recognize fear in another's facial expression (Campbell *et al.*, 2002). Consequently, the fear-recognition problems we describe in association with 45,X Turner syndrome must be due to a genetic or sex-steroid associated mechanism that is peculiar to that syndrome. We found increased grey matter volume bilaterally in the OFC of Turner syndrome individuals, relative to both normal females, and males. Unlike the amygdala, this region is not sexually dimorphic in structure. We propose that poor fear recognition among our TS subjects must therefore be causally linked to this OFC anomaly. It is well established that there are face-selective neurons in the primate OFC, and ventral frontal lobe damage in humans impairs the identification of facial expressions. The OFC receives inputs of the same general type as the amygdala, and is certainly connected intimately with it (Rolls, 2002). Specifically, we hypothesize that there is a deficit in functional connectivity between the amygdala and the OFC as a consequence of X-monosomy in females. The areas of maximal OFC abnormality bilaterally (Fig. 1) are close to a region, at BA 11, which was co-activated with amygdala in an aversive conditioning paradigm, using facial expressions as the conditioned stimuli (Morris *et al.*, 1997). The observation indicates these structures may act together as a functional unit. Males, who are of course also X-monosomic, could be protected from the OFC abnormality (despite their single X chromosome) because the critical gene(s) is expressed also from the Y-chromosome (hence there is dosage equivalence between males and females). Alternatively, there may be upregulation of the single male copy of an exclusively X-linked gene, by male sex steroids.

### Neurochemical anomalies

Within the critical region mapped in our investigation of females with partial deletions of the short arm of the X-chromosome, the *MAO* genes are clearly contenders for a potential influence upon amygdala development. Recently, Borowsky and colleagues showed that three of four members of a family of G protein-coupled receptors that are activated by trace amines, such as  $\beta$ -phenylethylamine, are expressed exclusively in the human amygdala (Borowsky *et al.*, 2001). Trace amines are exquisitely sensitive to the deaminergic actions of *MAO* genes (in the case of phenylethylamine it is especially *MAOB*; Grimsby *et al.*, 1997). Accordingly, the relatively low levels of *MAOB* activity consequent upon haploinsufficiency in males and 45,X females may lead to male-typical patterns of amygdala responsiveness, for example in the context of emotional learning (Canli *et al.*, 2002).

Genes that are subject to X-inactivation do not have functional Y-homologues, and because expression is from a

single X-chromosome in males and females the dosage is likely to be equivalent in both sexes. Furthermore, because in Turner syndrome (45,X) the single X-chromosome is always active it is unlikely that such genes are contributing in any significant way to the Turner phenotype. In contrast to *MAOB*, methylation analysis of the *MAOA* CpG island has suggested the gene might be subject to inactivation (Hendriks *et al.*, 1992). Although expression of *MAOA* has not been detected from Xi in cDNA from cloned human cell lines, the approach used (Hendriks *et al.*, 1992)—reverse transcription of intronic polymorphisms using random hexamers—has limited sensitivity. Heterogeneous expression from Xi has been demonstrated for some X-linked genes, indicating variability of inactivation between tissues and even between individual females (Carrel *et al.*, 1999). Testing of somatic cell hybrids suggests that some 5–15% of X-linked genes behave this way (Carrel *et al.*, 1999). Accordingly, *MAOA* could escape X-inactivation in some tissues. If so, activity would be relatively lower in 45,X than 46,XX females, and potentially sexually dimorphic, with lower activity in males. Such a mechanism could exacerbate sex differences in vulnerability to certain disorders, affecting predominantly males, which result from *MAOA* functional polymorphisms (e.g. Caspi *et al.*, 2002).

### Potential role of sex steroid deficiencies

Haploinsufficiency for genes at a dosage-sensitive X-linked locus is not the only possible explanation for the structural and functional characteristics of brains of 45,X females. One contributory factor that cannot be discounted by our data is interaction between sex steroid abnormalities and neurodevelopment. In 45,X Turner syndrome there is ovarian dysgenesis and failure of endogenous oestrogen production. Oestrogen receptors are widely expressed in the forebrain, with highest concentrations of the  $\alpha$ -subtype in the amygdala, and certain hypothalamic nuclei, in both primates and humans (Osterlund and Hurd, 2001). However, as we have shown (Table 1, Figures 2 and 3) there is no strict relationship between ovarian function and either the structural anomalies reported in the OFC and amygdala or the results of our psychological tests.

It is also possible that environmental influences—perhaps a disadvantage relating to short stature—could have systematically affected brain development of the 45,X females relative to 46,XX females. This explanation cannot account for the within-group differences in brain phenotype of our 46,XXp-subjects, who were all of short stature.

### Implications of findings for male susceptibility to autism

Our findings could have relevance to the aetiology of male susceptibility to disorders that are associated with social cognitive impairment, such as autism. This condition is at

least four times as common in males as females, and among subjects whose IQ is in the normal range (full scale >70) the ratio is substantially greater. No explanation has yet been found for this discrepancy in prevalence, but one possibility is that the phenotypic penetrance of genetic susceptibility due to autosomal loci is decreased in females, because they possess two X-chromosomes (Folstein and Rosen-Sheidley, 2001). Serotonin (5-hydroxytryptamine, 5-HT) blood levels have often been reported as elevated in platelets in about one-third of autistic subjects and their first-degree relatives (Betancur *et al.*, 2002). More than 99% of blood 5-HT is in the platelet fraction; normal levels of platelet 5-HT are higher in males than females. No explanation for the excessively high level in autism has been found, but a lack of MAOB activity, which is associated with relatively impaired aminergic degradation, is one possibility.

Individuals with high-functioning autism have a relatively specific failure to recognize—in the sense of being able consciously to label accurately—specifically fearful facial expressions (Howard *et al.*, 2000). They also have impaired facial recognition memory (Klin *et al.*, 1999) and deviant egocentric gaze monitoring (Calder *et al.*, 2002). Such individuals suffer from impaired theory of mind skills (Frith, 2001) and are unable to make rational judgements about the trustworthiness of strangers (Adolphs *et al.*, 2001; Tenyi *et al.*, 2002). Each of these aspects of social cognitive impairment has been reported in individuals with acquired or developmental lesions of the amygdala, although such individuals are not classically autistic. There are functional and structural anomalies of the amygdala in some, if not most, cases of autism (Sweeten *et al.*, 2002; Salmond *et al.*, 2003). As discussed, we are currently investigating the extent of similar cognitive and functional neural deficits in adult 45,X females of normal intelligence (e.g. Elgar *et al.*, 2002; Lawrence *et al.*, 2003a, b).

### **MAOB and male susceptibility to neurodevelopmental disorders**

In order to take this work to its logical conclusion, we need to establish first whether haploinsufficiency of *MAOB* is indeed the aetiological factor in the abnormal amygdala development in 45,X individuals. Males in whom *MAOB* is ablated, in the rare microdeletion variant of Norrie syndrome (Suarez-Merino *et al.*, 2001), are profoundly retarded in mental development. No systematic study has been done of female carriers of this microdeletion (who, like males, would have one functioning copy of the *Norrie* gene on their intact X-chromosome). We hypothesized that they may have a Turner-like phenotype in aspects of brain structure and function, because the microdeletion lies within the critical region we defined at Xp11.3. We did conduct a small study of this nature, in one family with a heritable deletion which encompassed not only the *Norrie disease* gene locus but also both *MAO* genes on one X-chromosome (deletion did not

extend beyond the markers DXS1027 and DXS1239 and involved a little less than 3 Mb of DNA). The results were intriguing. One of two sisters possessing a deletion of *MAOA* and *B*, as well as the *Norrie disease* gene locus on one X-chromosome, had a long history of severe psychiatric disorders of emotional regulation. These were associated with excessively low MAOB thrombocytic activity. The other sister had a disinhibited personality characterized by abnormally aggressive outbursts. Larger numbers would be required to confirm these findings and to permit adequate interpretation of the associated neuroimaging data. It is possible that some apparently idiopathic cases of profound male mental retardation could be due to non-functional mutations of the *MAOB* gene, a hypothesis for which there is tangential evidence (Holinski-Feder *et al.*, 1999). Confirmation of the X-inactivation status of *MAOB* is required (as well as the equivalent status of other genes in the critical region that are plausible candidates).

### **Conclusions**

In summary, our data imply that one or more non-inactivated X-linked genes (within a 4.96 Mb interval at Xp11.3) are involved in the development of a neural system influencing social cognitive processing, in which the amygdala plays a critical role. Our findings suggest that the critical gene is expressed in two copies in normal 46,XX females, and that full dosage compensation does not occur in 46,XY males (with consequent structural amygdala changes), or in 45,X monosomy (in which more extensive structural and cognitive anomalies ensue). Sexual dimorphism in the expression patterns of one or more genes at this locus is therefore predicted. MAOB is proposed as a candidate gene, with an important contributory role in the development of the amygdala.

### **Acknowledgements**

We thank E. Percy and P. Brooks, who first drew our attention to the emotion recognition deficits of Turner syndrome females. We are grateful to S. Ennis, who scrutinized genome databases on our behalf, and to I. S. Johnsrude and E. A. Maguire, who provided invaluable support during the imaging of our subjects. R. Akers assisted with the collection of neuropsychological data. We thank especially all the subjects of our investigation for their time and patience. Finally, we express our gratitude to P. A. Jacobs for her encouragement and inspiration. This research was supported by the Wellcome Trust.

### **References**

Adolphs R, Tranel D, Hamann S, Young AW, Calder AJ, Phelps EA, et al. Recognition of facial emotion in nine individuals with bilateral amygdala damage. *Neuropsychologia* 1999; 37: 1111–7.

- Adolphs R, Sears L, Piven J. Abnormal processing of social information from faces in autism. *J Cogn Neurosci*. 2001; 13: 232–40.
- Adolphs R, Baron-Cohen S, Tranel D. Impaired Recognition of Social Emotions following Amygdala Damage. *J Cogn Neurosci*. 2002; 14: 1264–74.
- Amaral DG. The primate amygdala and the neurobiology of social behavior: implications for understanding social anxiety. *Biol Psychiatry* 2002; 51: 11–7.
- Ashburner J, Friston KJ. Voxel-based morphometry—the methods. *Neuroimage* 2000; 11: 805–21.
- Aylward EH, Minshew NJ, Goldstein G et al. MRI volumes of amygdala and hippocampus in non-mentally retarded autistic adolescents and adults. *Neurology* 1999; 53: 2145–2150.
- Bailey A, Luthert P, Dean A et al. A clinicopathological study of autism. *Brain* 1998; 121: 889–905.
- Baron-Cohen S. The extreme male brain theory of autism. *Trends Cogn Sci* 2002; 6: 248–54.
- Baron-Cohen S, Baldwin DA, Crowson M. Do children with autism use the speaker's direction of gaze strategy to crack the code of language? *Child Dev* 1997; 68: 48–57.
- Baron-Cohen S, Ring HA, Bullmore ET, Wheelwright S, Ashwin C, Williams SC. The amygdala theory of autism. *Neuroscience Biobehavioral Rev* 2000; 24: 355–64.
- Bauman M, Kemper TL. Histoanatomic observations of the brain in early infantile autism. *Neurology* 1985; 35: 866–74.
- Betancur C, Corbex M, Spieleswoy C, Philippe A, Laplanche JL, Launay JM, et al. Serotonin transporter gene polymorphisms and hyperserotonemia in autistic disorder. *Mol Psychiatry* 2002; 7: 67–71.
- Blaschke RJ, Rappold GA. SHOX in short stature syndromes. *Horm Res* 2001; 55 Suppl 1: 21–3.
- BMJ* 1991; 302: 1194.
- Borowsky B, Adham N, Jones KA et al. Trace amines: identification of a family of mammalian G protein-coupled receptors. *Proc Natl Acad Sci USA* 2001; 98: 8966–71.
- Boumil RM, Lee JT. Forty years of decoding the silence in X-chromosome inactivation. *Hum Mol Genet* 2001; 10: 2225–32.
- Brothers L. Friday's footprint: how society shapes the human mind. New York: Oxford University Press; 1997.
- Calder AJ, Lawrence AD, Keane J, Scott SK, Owen AM, Christoffels I, et al. Reading the mind from eye gaze. *Neuropsychologia* 2002; 40: 1129–38.
- Campbell R, Elgar K, Kuntsi J, Akers R, Terstegge J, Coleman M, et al. The classification of 'fear' from faces is associated with face recognition skill in women. *Neuropsychologia* 2002; 40: 575–84.
- Canli T, Desmond JE, Zhao Z, Gabrieli JD. Sex differences in the neural basis of emotional memories. *Proc Natl Acad Sci USA* 2002; 99: 10789–94.
- Carrel L, Cottle AA, Goglin KC, and Willard HF. A first-generation X-inactivation profile of the human X chromosome. *Proc Natl Acad Sci USA* 1999; 96: 14440–4.
- Caspi A, McClay J, Moffitt TE, Mill J, Martin J, Craig IW, et al. Role of genotype in the cycle of violence in maltreated children. *Science* 2002; 297: 851–4.
- Cavada C, Company T, Tejedor J, Cruz-Rizzolo RJ, Reinoso-Suarez F. The anatomical connections of the macaque monkey orbitofrontal cortex. A review. *Cereb.Cortex* 2000; 10: 220–42.
- Chen ZY, Powell JF, Hsu YP, Breakefield XO, Craig IW. Organization of the human monoamine oxidase genes and long-range physical mapping around them. *Genomics* 1992; 14: 75–82.
- Creswell CS, Skuse DH. Autism in association with Turner syndrome: genetic implications for male vulnerability to pervasive developmental disorders. *Neurocase* 1999; 5: 101–8.
- Davies S, Bishop D, Manstead AS, Tantam D. Face perception in children with autism and Asperger's syndrome. *J Child Psychol Psychiatry* 1994; 35: 1033–57.
- Deichmann R, Good CD, Josephs O, Ashburner J, Turner R. Optimization of 3-D MP-RAGE sequences for structural brain imaging. *Neuroimage* 2000; 12: 112–27.
- Disteche CM. Escapees on the X chromosome. *Proc Natl Acad Sci USA* 1999; 96: 14180–2.
- Elgar K, Campbell R, Skuse D. Are you looking at me? Accuracy in processing line of sight in Turner syndrome. *Proc R Soc Lond B Biol Sci* 2002; 269: 2415–22.
- Ekman P, Friesen WV. Pictures of facial affect. Palo Alto: Consulting Psychologists Press; 1976.
- Folstein SE, Rosen-Sheidley B. Genetics of autism: complex aetiology for a heterogeneous disorder. *Nat Rev Genet* 2001; 2: 943–55.
- Frith U. Mind blindness and the brain in autism. *Neuron* 2001; 32: 969–79.
- Goldstein JM, Seidman LJ, Horton NJ, Makris N, Kennedy DN, Caviness VS Jr, et al. Normal sexual dimorphism of the adult human brain assessed by in vivo magnetic resonance imaging. *Cereb Cortex* 2001; 11: 490–7.
- Good CD, Johnsrude IS, Ashburner J, Henson RNA, Friston KJ, Frackowiak RSJ. Cerebral asymmetry and the effects of sex and handedness on brain structure: a voxel-based morphometric study of 465 normal adult human brains. *Neuroimage* 2001a; 14: 685–700.
- Good CD, Johnsrude IS, Ashburner J, Henson RNA, Friston KJ, Frackowiak RSJ. A voxel-based morphometric study of ageing in 465 normal adult human brains. *Neuroimage* 2001b; 14: 21–36.
- Grelotti DJ, Gauthier I, Schultz RT. Social interest and the development of cortical face specialization: what autism teaches us about face processing. *Dev Psychobiol* 2002; 40: 213–25.
- Grimsby J, Toth M, Chen K, Kumazawa T, Klaidman L, Adams JD, et al. Increased stress response and beta-phenylethylamine in MAOB-deficient mice. *Nature Genet* 1997; 17: 206–10.
- Harro M, Eensoo D, Kiive E, Merenakk L, Alep J, Oreland L, et al. Platelet monoamine oxidase in healthy 9- and 15-years old children:

- the effect of gender, smoking and puberty. *Prog Neuropsychopharmacol Biol Psychiatry* 2001; 25: 1497–511.
- Hendriks RW, Chen ZY, Hinds H, Schuurman RK, Craig IW. An X chromosome inactivation assay based on differential methylation of a CpG island coupled to a VNTR polymorphism at the 5' end of the monoamine oxidase A gene. *Hum Mol Genet* 1992; 1: 187–94.
- Hirstein W, Iversen P, Ramachandran VS. Autonomic responses of autistic children to people and objects. *Proc R Soc Lond B Biol Sci* 2001; 268: 1883–8.
- Holinski-Feder E, Chahrockh-Zadeh S, Rittinger O et al. Nonsyndromic X-linked mental retardation: mapping of MRX58 to the pericentromeric region. *Am J Med Genet* 1999; 86: 102–106.
- Howard MA, Cowell PE, Boucher J, Brooks P, Mayes A, Farrant A, et al. Convergent neuroanatomical and behavioural evidence of an amygdala hypothesis of autism. *Neuroreport* 2000; 11: 2931–5.
- Jacobs P, Dalton P, James R, Mosse K, Power M, Robinson D, et al. Turner syndrome: a cytogenetic and molecular study. *Ann Hum Genet* 1997; 61: 471–83.
- James RS, Coppin B, Dalton P, Dennis NR, Mitchell C, Sharp AJ, et al. A study of females with deletions of the short arm of the X chromosome. *Hum Genet* 1998; 102: 507–16.
- Kemper TL, Bauman ML. Neuropathology of infantile autism. *Mol Psychiatry* 2002; 7 Suppl 2: S12–3.
- Klin A, Sparrow SS, de Bildt A, Cicchetti DV, Cohen DJ, Volkmar FR. A normed study of face recognition in autism and related disorders. *J Autism Dev Disord* 1999; 29: 499–508.
- Klin A, Jones W, Schultz R, Volkmar F, Cohen D. Visual fixation patterns during viewing of naturalistic social situations as predictors of social competence in individuals with autism. *Arch Gen Psychiatry* 2002; 59: 809–16.
- Lawrence K, Campbell R, Swettenham J et al. Interpreting gaze in Turner syndrome: impaired sensitivity to intention and emotion, but preservation of social cueing. *Neuropsychologia* 2003a; 1571: 1–12.
- Lawrence K, Kuntsi J, Coleman M, Campbell R, Skuse D. Face and emotion recognition deficits in Turner syndrome: a possible role for X-linked genes in amygdala development. *Neuropsychologia* 2003b; 17: 39–49.
- Lyon MF. Gene action in the X-chromosome of the mouse (*Mus musculus* L). *Nature* 1961; 190: 372–3.
- McCauley E, Kay T, Ito J, Treder R. The Turner syndrome: cognitive deficits, affective discrimination, and behavior problems. *Child Dev* 1987; 58: 464–73.
- McCauley E, Feuillan P, Kushner H, Ross JL. Psychosocial development in adolescents with Turner syndrome. *J Dev Behav Pediatr* 2001; 22: 360–5.
- Morris JS, Friston KJ, Dolan RJ. Neurol responses to salient visual stimuli. *Proc R Soc Lond B Biol Sci* 1997; 264: 769–75.
- Murphy DG, DeCarli C, Daly E, Haxby JV, Allen G, White BJ, et al. X-chromosome effects on female brain: a magnetic resonance imaging study of Turner's syndrome. *Lancet* 1993; 342: 1197–200.
- Osterlund MK, Hurd YL. Estrogen receptors in the human forebrain and the relation to neuropsychiatric disorders. *Prog Neurobiol* 2001; 64: 251–67.
- Patwardhan AJ, Brown WE, Bender BG, Linden MG, Eliez S, Reiss AL. Reduced size of the amygdala in individuals with 47,XXY and 47,XXX karyotypes. *Am J Med Genet* 2002; 114: 93–8.
- Pierce K, Muller RA, Ambrose J, Allen G, Courchesne E. Face processing occurs outside the fusiform 'face area' in autism: evidence from functional MRI. *Brain* 2001; 124: 2059–73.
- Rao E, Weiss B, Fukami M et al. Pseudoautosomal deletions encompassing a novel homeobox gene cause growth failure in idiopathic short stature and Turner syndrome. *Nature Genetics* 1997; 16: 54–63.
- Reiss AL, Mazzocco MM, Greenlaw R, Freund LS, Ross JL. Neurodevelopmental effects of X monosomy: a volumetric imaging study. *Ann Neurol* 1995; 38: 731–8.
- Rolls ET. Neurophysiology and functions of the primate amygdala, and the neural basis of emotion. In: Aggleton JP, editor. *The amygdala*. 2nd ed. Oxford: Oxford University Press; 2000. p. 447–78.
- Rolls ET. In: Aggleton JP, editor. *The Amygdala* (2nd Ed) Oxford: Oxford University Press; 2002. p. 447–78.
- Ross J, Zinn A, McCauley E. Neurodevelopmental and psychosocial aspects of Turner syndrome. *Ment Retard Dev Disabil Res Rev* 2000; 6: 135–41.
- Ross JL, Stefanatos GA, Kushner H, Zinn A, Bondy C, Roeltgen D. Persistent cognitive deficits in adult women with Turner syndrome. *Neurology* 2002; 58: 218–25.
- Ruffman T, Garnham W, Rideout P. Social understanding in autism: eye gaze as a measure of core insights. *J Child Psychol Psychiatry* 2001; 42: 1083–1094.
- Salmond CH, de Haan M, Friston KJ, Gadian DG, Vargha-Khadem F. Investigating individual differences in brain abnormalities in autism. *Philos Trans R Soc Lond B Biol Sci* 2003; 358: 405–13.
- Shih JC, Thompson RF. Monoamine oxidase in neuropsychiatry and behavior. *Am J Hum Genet* 1999; 65: 593–8.
- Skuse DH, James RS, Bishop DV, Coppin B, Dalton P, Aamodt-Leeper G, et al. Evidence from Turner's syndrome of an imprinted X-linked locus affecting cognitive function. *Nature* 1997; 387: 705–8.
- Skuse D, Elgar K, Morris E. Quality of life in Turner syndrome is related to chromosomal constitution: implications for genetic counselling and management. *Acta Paediatr Suppl* 1999; 88: 110–13.
- Skuse DH. Behavioural neuroscience and child psychopathology: insights from model systems. *J Child Psychol Psychiatr* 2000; 41: 3–31.
- Stefanacci L, Amaral DG. Some observations on cortical inputs to the macaque monkey amygdala: an anterograde tracing study. *J Comp Neurol* 2002; 451: 301–23.
- Suarez-Merino B, Bye J, McDowall J, Ross M, Craig IW. Sequence analysis and transcript identification within 1.5 MB of DNA deleted

together with the NDP and MAO genes in atypical Norrie disease patients presenting with a profound phenotype. *Hum Mutat* 2001; 17: 523.

Sudbrak R, Wieczorek, Nuber UA, Mann W, Kirchner R, Erdogan F, et al. X chromosome-specific cDNA arrays: identification of genes that escape from X-inactivation and other applications. *Hum Mol Genet* 2001; 10: 77–83.

Sweeten TL, Posey DJ, Shekhar A, McDougle CJ. The amygdala and related structures in the pathophysiology of autism. *Pharmacol Biochem Behav* 2002; 71: 449–55.

Temple CM, Carney RA. Patterns of spatial functioning in Turner's syndrome. *Cortex* 1995; 31: 109–18.

Tenyi T, Herold R, Szili IM, Trixler M. Schizophrenics show a failure in the decoding of violations of conversational implicatures. *Psychopathology* 2002; 35: 25–7.

Teunisse JP, de Gelder B. Impaired categorical perception of facial expressions in high-functioning adolescents with autism. *Neuropsychol Dev Cogn Sect C Child Neuropsychol* 2001; 7: 1–14.

Wechsler D. Wechsler Adult Intelligence Scale—Revised. New York: Psychological Corporation; 1986.

Winston JS, Strange BA, O'Doherty J, Dolan RJ. Automatic and intentional brain responses during evaluation of trustworthiness of faces. *Nat Neurosci* 2002; 5: 277–83.

Xu J, Burgoyne PS, Arnold AP. Sex differences in sex chromosome gene expression in mouse brain. *Hum Mol Genet* 2002; 11: 1409–19.

Zechner U, Wilda M, Kehrer-Sawatzki H, Vogel W, Fundele R, Hameister H. A high density of X-linked genes for general cognitive ability: a run-away process shaping human evolution? *Trends Genet* 2001; 17: 697–701.

Zinn AR, Ross JL. Turner syndrome and haploinsufficiency. *Curr Opin Genet Dev* 1998; 8: 322–7.

*Received December 20, 2002. Revised February 26, 2003.*

*Second revision May 15, 2003. Accepted May 26, 2003*
